# Supplementary material for: Ultrastructural study of the thymus of Mugil liza Valenciennes, 1836 juveniles
Source: PubMed Central journal article supplement — Fish Shellfish Immunol Rep. 2020 Dec 19;2:100005. doi: 10.1016/j.fsirep.2020.100005 (PMC9680114; doi:10.1016/j.fsirep.2020.100005), 2020-12-19
Supplement: mmc1.pdf [file mmc1.pdf]

This document certifies that the manuscript

## **Ultrastructural study of the thymus of Mugil liza Valenciennes, 1836 juveniles**

prepared by the authors

**Ane Felice Frâncio de Medeiros, Virgínia Fonseca Pedrosa, Luis Alberto Romano**

was edited for proper English language, grammar, punctuation, spelling, and overall style by one or more of the highly qualified native English speaking editors at AJE.

This certificate was issued on **September 30, 2020** and may be verified on the [AJE website](#) using the verification code **942D-29DO-F41B-D626-A2C9**.

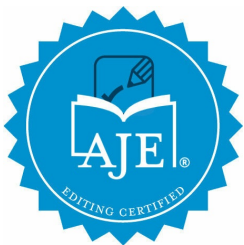

Neither the research content nor the authors' intentions were altered in any way during the editing process. Documents receiving this certification should be English-ready for publication; however, the author has the ability to accept or reject our suggestions and changes. To verify the final AJE edited version, please visit our verification page at [aje.com/certificate](#). If you have any questions or concerns about this edited document, please contact AJE at [support@aje.com](mailto:support@aje.com).
